1 **RefSoil: A reference database of soil microbial genomes**

2 Running title: A reference database of soil microbial genomes

3

4 Jinlyung Choi<sup>1</sup>, Fan Yang<sup>1</sup>, Ramunas Stepanauskas<sup>2</sup>, Erick Cardenas<sup>3</sup>, Aaron  
5 Garoutte<sup>4</sup>, Ryan Williams<sup>1</sup>, Jared Flater<sup>1</sup>, James M Tiedje<sup>4</sup>, Kirsten S. Hofmockel<sup>5, 6</sup>,  
6 Brian Gelder<sup>1</sup>, Adina Howe<sup>1§</sup>

7

8 <sup>1</sup>Agricultural and Biosystems Engineering, Iowa State University, Iowa, United  
9 States

10 <sup>2</sup>Bigelow Laboratory for Ocean Sciences, Maine, United States

11 Ramunas Stepanauskas

12 <sup>3</sup>Department of Microbiology & Immunology, University of British Columbia,  
13 Vancouver, Canada

14 <sup>4</sup>Center for Microbial Ecology, Michigan State University, Michigan, United States

15 <sup>5</sup>Environmental Molecular Sciences Laboratory, Pacific Northwest National  
16 Laboratory, Washington, United States

17 <sup>6</sup>Department of Ecology, Evolution and Organismal Biology, Iowa State University,  
18 Iowa, United States

19

20 §Corresponding author

21

22 Corresponding author addresses:

23 Name: Adina Howe

24 Postal address: 1201 Sukup Hall Ames IA, 50011 United States

25 Telephone: +1-515-294-0176

26 E-mail: [adina@iastate.edu](mailto:adina@iastate.edu)

27

28

29 **Subject Categories**

30 Microbial population and community ecology

31

32

33

34

35

36

37

38

39

40

41

42

43

44

45

## 46 **Abstract**

47

48 A database of curated genomes is needed to better assess soil microbial  
49 communities and their processes associated with differing land management and  
50 environmental impacts. Interpreting soil metagenomic datasets with existing  
51 sequence databases is challenging because these datasets are biased towards  
52 medical and biotechnology research and can result in misleading annotations. We  
53 have curated a database of 922 genomes of soil-associated organisms (888 bacteria  
54 and 34 archaea). Using this database, we evaluated phyla and functions that are  
55 enriched in soils as well as those that may be underrepresented in RefSoil. Our  
56 comparison of RefSoil to soil amplicon datasets allowed us to identify targets that if  
57 cultured or sequenced would significantly increase the biodiversity represented  
58 within RefSoil. To demonstrate the opportunities to access these underrepresented  
59 targets, we employed single cell genomics in a pilot experiment to sequence 14  
60 genomes. This effort demonstrates the value of RefSoil in the guidance of future  
61 research efforts and the capability of single cell genomics as a practical means to fill  
62 the existing genomic data gaps.

63

## 64 **Introduction**

65

66 Microbial populations in the soil impact the structure and fertility of our soils  
67 by contributing to nutrient availability, soil stability, plant productivity, and  
68 protection against disease and pathogens. Soil microbiology has a rich history of  
69 isolating and characterizing representatives from the soil to assess their impacts on  
70 soil health and stability. However, despite significant efforts to isolate microbes  
71 from the soil, we have accessed only a small fraction of its biodiversity, with  
72 estimates of less than 1 to 50 percent of species, even with novel isolation  
73 techniques (Van H T Pham and Kim, 2012; Vartoukian *et al.*, 2010; Schoenborn *et al.*,  
74 2004; Burmølle *et al.*, 2009; Janssen *et al.*, 2002; Ling *et al.*, 2015). With advances in  
75 DNA sequencing technologies, we can now directly interrogate soil metagenomes,  
76 allowing for the characterization of soil communities without the need to first  
77 cultivate isolates. However, our ability to annotate and characterize the retrieved  
78 genes is dependent on the availability of informative reference gene or genome  
79 databases. The largest resource of full genome reference sequences for annotating  
80 genes is the NCBI RefSeq database (Tatusova *et al.*, 2013), which contains a total of  
81 57,993 genomes (Release 74). While broadly useful, this database is not  
82 representative of the large majority of soil microbiomes, and the majority of genes  
83 in previously published soil metagenomes (65-90%) cannot be annotated against  
84 known genes (Delmont *et al.*, 2012; Fierer *et al.*, 2012). Further, contributions to the  
85 NCBI databases have largely originated from human health and biotechnology  
86 research efforts that can mislead annotations of genes originating from soil  
87 microbiomes (e.g., annotations that are clearly not compatible with life in soil).

88 Soil microbiologists are not the first to face the problem of a limited  
89 reference database. The NIH Human Microbiome Project (HMP) recognized the  
90 critical need for a well-curated reference genome dataset and developed a reference

91 catalog of 3,000 genomes that were isolated and sequenced from human-associated  
92 microbial populations(Huttenhower *et al.*, 2012). This publicly available reference  
93 set of microbial isolates and their genomic sequences aids in the analysis of human  
94 microbiome sequencing data(Segata *et al.*, 2012; Wu *et al.*, 2009) and also provides  
95 strains for which isolates (both culture collections and nucleic acids) are available as  
96 resources for experiments. Following this successful model of the HMP, we have  
97 developed a curated database of reference genome sequences that originate from  
98 soil. This database, called RefSoil, represents the current state of knowledge of  
99 sequenced soil genomes. In addition to helping us to understand known soil  
100 microbiology, RefSoil aids in the identification of knowledge gaps that need to be  
101 filled to improve our understanding of soil biodiversity. We discuss the importance  
102 the RefSoil database and demonstrate exciting opportunities to expand this  
103 database and its applications in the future.

104

## 105 **Materials and Methods**

106

### 107 **Creation of RefSoil Database**

108 In order to create a soil-specific reference genome dataset, we targeted genome  
109 sequences based on evidence that isolates had origins in soil systems. A total of  
110 6,646 complete genomes were obtained from the Genomes OnLine Database (GOLD,  
111 <https://gold.jgi.doe.gov>, October 9th, 2014); the GOLD database was chosen because  
112 of the availability of metadata, particularly environmental origin, related to genome  
113 sequences. These genomes were further selected based on soil-association with the  
114 following criteria: (1) Within the GOLD database, organism information and  
115 organism metadata (known habitats, ecosystem category, and ecosystem type) was  
116 required to identify organism as originating in soil-associated categories. Organisms  
117 from marine and deep sea environments were excluded, though these organisms  
118 often were identified as soil-associated. Additionally, obligate host-associated  
119 pathogens and extremophiles were excluded, as these organisms are unlikely to be  
120 present in the absence of their host or in representative soil samples. We  
121 considered these organisms to often be under very strong selective pressures that  
122 can lead to reduced genomes or high rates of recombination that are difficult to  
123 assess soil-specific trends. (2) For organisms that lacked appropriate metadata in  
124 GOLD, a Google Custom Search was used to query all available websites for the  
125 organism name and soil-related terms (rhizosphere, soil, sand, mud, or nodule).  
126 Priorities were placed on the following websites:  
127 <http://www.ncbi.nlm.nih.gov/pubmed/>, <http://www.straininfo.net/>,  
128 <https://microbewiki.kenyon.edu/index.php/MicrobeWiki>,  
129 <https://en.wikipedia.org/>, and <https://scholar.google.com>. Genomes with an  
130 association with at least one webpage containing search query phrases were  
131 included in RefSoil. This approach was tested with known soil-associated organisms,  
132 verifying that it would reliably predict soil association for these organisms. Within  
133 resulting genomes, duplicated chromosomes and strains were removed. If multiple  
134 genome accession numbers were associated with a single strain, the most recent  
135 genome sequence was chosen. NCBI Genbank annotation files associated with each

136 strain were obtained on 2/18/16. The genomes contained within RefSoil are  
137 provided in Supplementary Table 1.

138

### 139 **Characterization of organisms in RefSoil**

140 All RefSoil genome sequences were associated with their NCBI RefSeq  
141 accession ID and obtained from NCBI. Using NCBI Genbank CDS annotations, 16S  
142 rRNA gene sequences were identified. If multiple 16S rRNA gene sequences were  
143 present, the first sequence from the first chromosome (by NCBI index) was selected  
144 as representative for the genome. Three genomes lacked annotations of a 16S rRNA  
145 gene and a 16S rRNA gene HMM model was used and identified an additional 16S  
146 rRNA sequence (Guo *et al.*, 2015). In total, 886 16S rRNA gene sequences were used  
147 to build a phylogenetic tree for bacterial genomes within RefSoil (Fig. 1). All  
148 bacterial 16S rRNA gene sequences were aligned using RDP's bacterial model  
149 (Infernal 1.1.1 (Nawrocki and Eddy, 2013)), and a Maximum-likelihood  
150 phylogenetic tree was constructed based on the Jukes-Cantor model by Fasttree  
151 (Price *et al.*, 2010) and visualized with Graphlan (R 3.2.2, version 0.9.7) (Fig. 1). The  
152 scripts for these approaches are publicly available on [https://github.com/germs-lab/ref\\_soil](https://github.com/germs-lab/ref_soil).  
153 RefSoil genomes were extracted from corresponding genomes  
154 contained within NCBI RefSeq (release 74). Annotations of taxonomy for RefSoil and  
155 RefSeq genes were obtained from NCBI (February 19, 2016) (Supplementary Fig. 1).  
156 RefSoil genomes were submitted to RAST and genes were annotated using SEED  
157 subsystem ontology (Supplementary Table 1). Among 1,811,233 unique genes,  
158 approximately 39.1% of them were assigned to multiple SEED subsystem level 1  
159 categories. For the purpose of this study, we included all annotations at subsystem  
160 level 1 for each unique gene, which expanded the total gene counts to 2,619,643.  
161 The percent abundance of genes from each phylum in RefSoil database was also  
162 adjusted accordingly by including the abundance of genes that were assigned to  
163 multiple subsystem level 1 categories (Fig. 2 and Supplement Table 2). The number  
164 of phyla identified in each subsystem level 1 categories was summarized in  
165 Supplemental Table 3.

166

### 167 **EMP databases used in this study**

168 A total of 15,481 amplicon datasets that form the EMP dataset were available  
169 to compare environmental soil amplicons to RefSoil (total 5,594,412 OTUs,  
170 clustered at 97%) (Rideout *et al.*, 2014). Soil samples were selected based on their  
171 association with soil metadata resulting in a total of 2,476,795 OTUs from 3035  
172 samples. A total of 2,158 unique taxonomy assignments were identified for EMP  
173 OTUs using the RDP Classifier (Wang *et al.*, 2007) and used to construct a  
174 phylogenetic tree with the Graphlan package (R 3.2.2, version 0.9.7) (Fig. 3).  
175 Abundances for each taxonomic assignment were calculated as the sum of  
176 abundance of OTUs associated with that taxonomy.

177 To evaluate the presence of RefSoil genomes in EMP, EMP and RefSoil 16S  
178 rRNA gene amplicons were compared by alignment with BLAST, requiring an  
179 alignment with greater than 97% similarity, a minimum alignment of 72 bp, and E-  
180 value  $\leq 1e-5$ . If multiple hits were aligned, the hit with the lowest E-value was  
181 selected as representative. Using these criteria, a total of 53,538 EMP OTUs were

182 associated RefSoil 16s rRNA genes (1.4% of total EMP OTUs; 10.2% of all EMP  
183 amplicons).

184 Soil order for EMP samples located in the United States (1817 samples) was  
185 obtained based on GPS location associated with sample metadata; locations were  
186 only considered valid if the coordinates entered were actually located in the United  
187 States (1627 samples). Valid GPS points were then located within a soil order by  
188 querying the USDA NRCS Global Soil Regions map (Reich) (Accessed on January 26,  
189 2016) for soil order plus a Rock/Sand/Ice category using ArcGIS 10.3.1. RefSoil  
190 representatives for EMP OTUs were determined by similarity as described above  
191 (Supplementary Table 4).

192

### 193 **Most-wanted soil OTUs**

194 The selection of the most wanted OTUs for RefSoil based on EMP-associated  
195 amplicons was based on presence in EMP samples, using the criteria of EMP-RefSoil  
196 similarity as described above, and abundance (number of amplicons associated with  
197 the OTU in EMP samples). Candidate OTUs were ranked based on its observed  
198 frequency in all EMP samples and abundance in EMP amplicons (Top 100 shown in  
199 Supplementary Table 5 and 6). Taxonomy was assigned by the RDP classifier (Wang  
200 *et al.*, 2007). The 21 OTUs present in both 'the most abundance' and 'the most  
201 frequent' are listed in the Table 1.

202

### 203 **Single cell genomics**

204 For single cell genomics, a soil sample was collected from 0-10 cm depth in a  
205 residential garden in Nobleboro, Maine (44° 5'48.10"N, 69°29'10.56"W) on May 5<sup>th</sup>,  
206 2015. Approximately five grams of the sample were mixed with 30 mL sterile-  
207 filtered phosphate-saline buffer (PBS), vortexed for 30 s at maximum speed, and  
208 centrifuged for 30 s at 2,000 rpm. The obtained supernatant was diluted to below  
209  $10^5$  cell x mL<sup>-1</sup> with PBS, pre-screened through a 40 µm mesh-size cell strainer (BD),  
210 and incubated with SYTO-9 DNA stain (5 µM; Invitrogen) for 10-60 min. The  
211 generation of single amplified genomes (SAGs) and their genomic sequencing were  
212 performed by the Bigelow Laboratory Single Cell Genomics Center  
213 (scgc.bigelow.org), as previously described (Stepanauskas *et al.*). SAGs representing  
214 the "most-wanted list" were selected based on 16S rRNA gene BLAST alignments  
215 with greater than 97% similarity over at least 72 bp.

216

### 217 **Code and sequencing data availability**

218 The analysis code used to generate the results is available from  
219 [https://github.com/germs-lab/ref\\_soil](https://github.com/germs-lab/ref_soil). All 14 single-cell sequencing data sets have  
220 been deposited at the NCBI. Sequencing data with NCBI accession identifier are  
221 listed in Table 2.

222

223

224

225

226

227

## 228 **Results**

229

### 230 *Phylogenetic and functional characterization of RefSoil*

231 RefSoil is a manually curated database containing a total 922 genomes of  
232 soil-associated organisms, comprised of 888 bacteria and 34 archaea  
233 (Supplementary Table 1). The genomes within RefSoil (soil-associated) and RefSeq  
234 (all environments) reference databases were compared. Both genome databases  
235 contained similar dominant phyla, including Proteobacteria, Firmicutes, and  
236 Actinobacteria, comprising over 91% and 88% of genomes in RefSoil and RefSeq  
237 bacteria, respectively. RefSoil contained higher proportions of Armatimonadetes,  
238 Germmatimonadetes, Thermodesulfobacteria, Acidobacteria, Nitrospirae, and  
239 Chloroflexi than RefSeq, suggesting that these phyla may be enriched in the soil or  
240 underrepresented in the RefSeq database. A total of eleven RefSeq-associated  
241 phylums were absent from RefSoil indicating that these phyla may be absent or  
242 difficult to cultivate in soil environments (Supplementary Fig. 1). The 16S rRNA  
243 genes for RefSoil bacterial genomes were obtained from NCBI Genbank annotations  
244 and aligned to construct a phylogenetic tree representing RefSoil phylogenetic  
245 diversity (Fig. 1).

246 RefSoil bacterial and archaeal genomes were further annotated with the  
247 Rapid Annotation using Subsystem Technology (RAST, v 2.0(Aziz *et al.*, 2008))  
248 (Supplementary Table 1), resulting in the annotation of a total of 1,811,233 RAST-  
249 associated genes. RAST annotations, unlike GenBank annotations, include  
250 classification into functional ontologies or subsystems, allowing for the comparison  
251 of broad functions. Overall, 78% of the bacterial and archaeal genes could be  
252 classified into functional subsystems (Supplementary Table 2). For genes associated  
253 with each subsystem, we evaluated the phylogenetic origins of RefSoil genes and  
254 compared the phyla distribution of annotated genes with those within the  
255 cumulative RefSoil database (Fig. 2). If the proportion of genes associated with a  
256 phylum within a functional subsystem was greater than its representation in  
257 RefSoil, we considered the representation of the phyla *enriched* in this function (Fig.  
258 2, Supplementary Table 3). For example, we observed that in most subsystems (15  
259 out of 26 subsystems), Proteobacteria-associated genes were enriched relative to  
260 their representation within RefSoil (56% of all RefSoil genes associated with  
261 Proteobacteria). Additionally, Actinobacteria, Crenarchaeota, and Proteobacteria  
262 genes were enriched in functions related to metabolism of aromatic compounds;  
263 Firmicutes and Proteobacteria genes were enriched in functions related to iron  
264 acquisition and metabolism; and function category dormancy and sporulation was  
265 enriched with Firmicutes genes only. These enrichments indicate that organisms  
266 from a small number of phyla may have advantages over other organisms in  
267 environments where these functions are important.

268

### 269 *RefSoil compared to sequences originating from soil environments*

270 Genomes in RefSoil represent cultivated strains originating from soils that  
271 have been isolated and often characterized in laboratory conditions. In order to  
272 estimate their natural abundance in soils, we compared RefSoil to amplicon  
273 sequencing datasets from global soil microbiomes in the Earth Microbiome Project

274 (EMP)(Rideout *et al.*, 2014; Gilbert *et al.*, 2014). Amplicons (16S rRNA genes) from  
275 EMP datasets were clustered at 97% sequence similarity to determine  
276 representative operational taxonomic units (OTUs)(Rideout *et al.*, 2014). We  
277 selected only EMP samples that were associated with soil samples, resulting in a  
278 total of 3,035 samples. Within these soil samples, we observed that the majority of  
279 OTUs were rare (e.g., only observed in a few samples), with 76% of OTUs observed  
280 in less than ten soil samples, and 1% of OTUs representing 81% of total abundance  
281 in EMP.

282 Comparing RefSoil 16S rRNA genes to EMP amplicons, we observed that the  
283 majority of RefSoil 16S rRNA sequences were highly similar to EMP amplicons (over  
284 87% of RefSoil bacterial and archaeal 16S rRNA genes shared greater than 97%  
285 similarity with a minimum 72 bp alignment length). In contrast, 99% (2,442,432 of  
286 2,476,795) of EMP amplicons did not share high similarity (greater than 97%  
287 similarity) to RefSoil genes, suggesting that EMP soil samples contain much higher  
288 diversity than represented within RefSoil. While RefSoil genomes represent soil  
289 microbes that have been well-studied in the laboratory, the EMP amplicons  
290 represent microbes that have been observed in soils around the world but not  
291 necessarily well-characterized (e.g., limited to the observation of the presence of  
292 16S rRNA gene sequences).

293

#### 294 *Soil microbiomes associated with different soil types*

295 In 1975, a soil taxonomy was developed by the United States Department of  
296 Agriculture (USDA) and the National Resources Conservation Service, which  
297 separates soils into twelve orders that are based on their physical, chemical, or  
298 biological properties(Soil Survey Staff 1999, 1999). Despite the availability of this  
299 classification, it is rarely incorporated into soil microbiome surveys. Using RefSoil  
300 and estimated abundances from similar EMP OTUs, we evaluated microbial  
301 distribution in various soil orders. We obtained GPS data from EMP soil samples  
302 originating from the United States that allowed us to obtain the soil classification.  
303 Within these EMP samples, the most represented soil orders included Mollisols  
304 (58%, grassland fertile soils) and Alfisols (37%, fertile soils typically under forest  
305 vegetation) (Supplementary Table 4). The abundance of OTUs similar to RefSoil  
306 genes was used to estimate the membership of well-characterized isolates in these  
307 soil samples (Supplementary Fig. 2). Mollisols, Alfisols and Vertisols (soils with high  
308 clay content with pronounced changes in moisture) were associated with the most  
309 RefSoil representatives, while Gelisols (cold climate soils), Ultisols (soils with low  
310 cation exchange), and sand/rock/ice contained the least (Supplementary Table 4).

311

#### 312 *Identification of the most beneficial future targets for RefSoil*

313 EMP OTUs that do not share high similarity with 16S rRNA genes from  
314 RefSoil represent current knowledge gaps for which we lack cultivated isolates.  
315 These gaps were visually identified by overlaying the presence of highly similar  
316 relatives in RefSoil (similarity >97%) to branches in a phylogenetic tree of soil-  
317 associated EMP amplicons (Fig. 3). We evaluated the presence of OTUs in EMP  
318 libraries based on their presence in EMP samples (frequency) and their cumulative  
319 observed abundance. We identified the most observed and abundant EMP OTUs

320 that did not share high similarity to Refsoil to generate a “RefSoil’s most wanted list”  
321 of targets that, if isolated or sequenced, could provide information on prevalent but  
322 uncharacterized lineages (Table 1, Supplementary Table 5-6). OTUs sharing  
323 similarity to Verrucomicrobia (8 OTUs) and Acidobacteria (6 OTUs) were among the  
324 most abundant and frequently observed EMP OTUs that are not currently  
325 represented in RefSoil (Table 1). These targets, observed in nature but not in our  
326 database, would be ideal to isolate and characterize to better understand the soil  
327 biodiversity.

328

### 329 *Single cell genomics in soil*

330 Sequencing-based approaches provide an alternative to accessing the  
331 genomes of soil organisms without cultivation. Previous efforts have used assembly  
332 of genomes from metagenomes(Labonté *et al.*, 2015; Martijn *et al.*, 2015; Field *et al.*,  
333 2014) and single cell genomics(Gawad *et al.*, 2016; Lasken, 2012; Stepanauskas,  
334 2012) to obtain genomic blueprints of yet uncultured microbial groups. To evaluate  
335 the effectiveness of single cell genomics on soil communities, we performed a pilot-  
336 scale experiment on a residential garden soil in Maine. The 16S rRNA gene was  
337 successfully recovered from 109 of the 317 single amplified genomes (SAGs). This  
338 34% 16S rRNA gene recovery rate is comparable to single cell genomics studies in  
339 marine, freshwater and other environments(Martinez-Garcia *et al.*, 2011; Rinke *et*  
340 *al.*, 2013; Swan *et al.*, 2011). The 16S rRNA genes of 14 of these SAGs, belonging to  
341 Proteobacteria, Actinobacteria, Nitrospirae, Verrucomicrobia, Planktomyces,  
342 Acidobacteria and Chloroflexi, were selected based on their lack of representation  
343 within RefSoil. Genomic sequencing of those SAGs resulted in a cumulative assembly  
344 of 23 Mbp (Table 2, Supplementary Table 7). We estimated the abundance of OTUs  
345 similar to single cell 16S rRNA genes to range from 5E-7 to 2E-2% of EMP OTU  
346 abundances. These abundances are very low but comparable to the average and  
347 median relative abundance of OTUs within EMP (4E-3% and 1E-6%, respectively).  
348 If these draft genomes were added to RefSoil, these 14 SAGs would increase  
349 RefSoil’s representation of EMP amplicons by 7% by abundance.

350

## 351 **Discussion**

352

353 Advances in sequencing techniques for utilizing culture-independent  
354 approaches have created new opportunities for understanding soil microbiology  
355 and its impact on soil health, stability, and management. We provide RefSoil as a  
356 community genomic resource to provide high-quality curation of organisms that  
357 originate in soil studies, allowing us to more accurately annotate soil sequencing  
358 datasets. This database is an important initial effort to provide improved soil  
359 references, and we acknowledge that it is far from a complete representation of  
360 soil’s biodiversity. In fact, compared to EMP soils, RefSoil represents only 2% of  
361 observed EMP OTUs and 10% by abundance of the observed soil OTUs, highlighting  
362 the magnitude of soil biodiversity and the limitations of our current database based  
363 on cultivated representatives. These results are consistent with a recent effort  
364 demonstrating that we are very limited in our knowledge of not only soil but life’s  
365 diversity and advocating that much can be learned by including uncultivated



366 organisms(Hug *et al.*, 2016). We show here how RefSoil can be used to evaluate  
367 which organisms to target that would most effectively increase our knowledge of  
368 soil biodiversity. For example, if genome references were available for the top most  
369 wanted organisms identified in this effort (Table 1), we could expand RefSoil's  
370 representation of EMP soils by 58% by abundance.

371 Notably, many of these targets have previously been observed to be  
372 recalcitrant to cultivation with standard laboratory media, resulting in their absence  
373 in current genome databases. Acidobacteria, for example, is known to be slow  
374 growing and difficult to cultivate (Nunes da Rocha *et al.*, 2009) while also observed  
375 to be highly abundant in soil (33% of EMP amplicons by abundance). Another  
376 fastidious bacteria, Verrucomicrobia(Bergmann *et al.*, 2011), were also observed to  
377 be highly abundant (12.5%) in EMP but not well represented in RefSoil (two of 888  
378 bacterial genomes). Despite their absence from cultivated isolates, both  
379 Acidobacteria and Verrucomicrobia have been observed to be critical for nutrient  
380 cycling in soils (Nunes da Rocha *et al.*, 2009; Ward *et al.*, 2009; Fierer *et al.*, 2013;  
381 Martinez-Garcia *et al.*, 2012).

382 Novel isolation and culturing techniques will help us to access these  
383 previously difficult to grow bacteria and will also be complemented by emerging  
384 sequencing technologies. In particular, single-cell genomics hold great promise to  
385 provide genomic characterization of lineages that are difficult to culture (Gawad *et al.*,  
386 2016; Lasken, 2012; Stepanauskas, 2012). In our pilot experiment, we  
387 demonstrate, for the first time, that single-cell genomics is applicable on soil  
388 samples and is well suited to recover the genomic information from abundant but  
389 yet uncultured taxonomic groups. The 14 sequenced SAGs have significantly  
390 increased the extent to which RefSoil represents the predominant soil lineages from  
391 a single sample. Much larger single cell genomics projects are feasible and have been  
392 employed in prior studies of other environments(Kashtan *et al.*, 2014; Rinke *et al.*,  
393 2013; Swan *et al.*, 2013). The continued, rapid improvements in this technology are  
394 likely to lead to further scalability, offering a practical means to fill the existing gaps  
395 in the RefSoil database and biodiversity more broadly.

396 The RefSoil database is also a tool that allows us to characterize currently  
397 known soil bacteria phylogeny and functions. This database spans 24 phyla of  
398 bacteria and archaea. While genes related to microbial growth and reproduction  
399 (e.g., DNA, RNA, and protein metabolism) originate from diverse phyla, key  
400 functions related to metabolism of aromatic compounds, iron metabolism, and  
401 dormancy and sporulation were observed to be enriched from only a few RefSoil  
402 phyla, suggesting that these phyla may have specialized functions within soil  
403 communities. Specifically, Proteobacteria-associated genes were enriched in  
404 functions related to motility, chemotaxis, and membrane transportation (Figure 2),  
405 suggesting that Proteobacteria are likely to be efficient at acquiring readily available  
406 nutrients and elements for growth(Fierer *et al.*, 2007). Genes related to  
407 Proteobacteria and Actinobacteria were also found dominant among RefSoil  
408 genomes in subsystems related to the metabolism of aromatic compounds. This  
409 observation is consistent with the association of Proteobacteria and humic  
410 substances utilization and the contribution of Actinobacteria to plant material  
411 degradation(Godden *et al.*, 1992; Fuchs *et al.*, 2011).

412 By comparing RefSoil to other databases, we identified biases for specific  
413 phyla in RefSoil; in particular, Firmicutes are observed frequently in RefSoil but  
414 were not observed to be highly abundant in soil environments (5.7% of all EMP  
415 amplicons). Firmicutes have been well-studied as pathogens (Buffie and Pamer,  
416 2013; Kamada *et al.*, 2013; Rupnik *et al.*, 2009), likely biasing their representation in  
417 our databases and consequently their annotations in soil studies. A key advantage  
418 to the development of the RefSoil database is the opportunity to evaluate these  
419 biases and to identify targets for future curation that would create a more  
420 representative database resource for the soil. To this end, we evaluated the  
421 representation of RefSoil in various soils.

422 Consistent with previous observations that microbial community  
423 composition is correlated with soil environments (Fierer *et al.*, 2012; Fierer and  
424 Jackson, 2006), we observed specific RefSoil membership associated with soil  
425 taxonomy. Not all soil taxonomic orders were equally represented in RefSoil, with  
426 the most genomes associated with Mollisols, or grassland soils. This bias is likely  
427 due to increased research in these soils due to their importance for agriculture and  
428 productivity. In contrast, for Gellisol permafrost soils, which cover over 20% of  
429 Earth's terrestrial surface (Koven *et al.*, 2011) and are a significant carbon source  
430 from our biosphere to the atmosphere, we observe only a small fraction of known  
431 soil microbes are present. Previous studies suggest that high levels of novelty can  
432 be observed in permafrost microbiomes (Koven *et al.*, 2011; Mackelprang *et al.*,  
433 2011), suggesting that these soils could significantly benefit from improved  
434 references.

435 Another advantage to the RefSoil database is that it represents genomes for  
436 which strains should currently be available and for which we have high-quality  
437 genomes. As a consequence, genomes within RefSoil could help to inform and  
438 design soil microbiology experiments. For example, it is known that nitrogen cycling  
439 genes are abundant in agricultural soils (Xue *et al.*, 2013; Philippot *et al.*, 2007; Long  
440 *et al.*, 2012). A mock community of isolates known for participating in nitrogen  
441 cycling could be generated and proportionally designed to mimic soil conditions  
442 using RefSoil: these strains might include microorganisms related to *Streptomyces*  
443 *venezuelae* ATCC 10712 (assimilatory nitrate reductase), *Bacillus anthracis* (nitric  
444 oxide reductase), *Pseudomonas brassicacearum* (nitrous oxide reductase),  
445 *Halomonas elongata* DSM 2581 (ammonia monooxygenase), *Pseudomonas*  
446 *fluorescens* SBW25 (ammonia monooxygenase), and *Pleurocapsa sp.* PCC 7327  
447 (nitrogen fixation). Combining RefSoil and available amplicon datasets, one could  
448 estimate the proportions of strains as observed in soil samples.

449 In conclusion, RefSoil is an important first step towards building a more  
450 comprehensive, well-curated database. Though it is far from complete, we have  
451 been able to use RefSoil as a tool to identify key phyla that represent gaps in known  
452 soil diversity and underrepresented phyla. Going forward, this reference will be  
453 expanded as isolation and cultivation-independent technologies continue to  
454 improve.

455  
456  
457

458 **Acknowledgments**

459 We are grateful for the support of the NSF Terragenome International Soil  
460 Metagenome Sequencing Consortium for providing a collaborative workshop with  
461 the soil community for discussions to improve this project. This material is based  
462 upon work supported by the U.S. Department of Energy, Office of Science, Office of  
463 Biological and Environmental Research, under Award Number SC0010775.

464

465 **Contributions** E.C., A.G., A.H., and J.T. curated Refsoil; J.C. and A.H. collected the  
466 genome information to build the database; J.C., J.F., A.H., R.W., and F.Y., characterized  
467 and compared RefSoil to EMP datasets; B.G. provided soil orders for EMP samples;  
468 R.S. performed single cell genomics; J.T., K.H. and A. H. supervised the work; J.C., F.Y.,  
469 and A.H. wrote the manuscript with contributions from all other authors.

470

471 **Conflict of Interest**

472 The authors declare no conflict of interests.

473

474

475 **References**

- 476 Aziz RK, Bartels D, Best AA, DeJongh M, Disz T, Edwards RA, *et al.* (2008). The RAST  
477 Server: Rapid Annotations using Subsystems Technology. *BMC Genomics* **9**: 75.
- 478 Bergmann GT, Bates ST, Eilers KG, Lauber CL, Caporaso JG, Walters WA, *et al.*  
479 (2011). The under-recognized dominance of Verrucomicrobia in soil bacterial  
480 communities. *Soil Biology and Biochemistry* **43**: 1450–1455.
- 481 Buffie CG, Pamer EG. (2013). Microbiota-mediated colonization resistance against  
482 intestinal pathogens. *Nat Rev Immunol* **13**: 790–801.
- 483 Burmølle M, Johnsen K, Al-Soud WA, Hansen LH, Sørensen SJ. (2009). The presence  
484 of embedded bacterial pure cultures in agar plates stimulate the culturability of soil  
485 bacteria. *Journal of Microbiological Methods* **79**: 166–173.
- 486 Delmont TO, Prestat E, Keegan KP, Faubladièr M, Robe P, Clark IM, *et al.* (2012).  
487 Structure, fluctuation and magnitude of a natural grassland soil metagenome. *ISME J*  
488 **6**: 1677–1687.
- 489 Field EK, Sczyrba A, Lyman AE, Harris CC, Woyke T, Stepanauskas R, *et al.* (2014).  
490 Genomic insights into the uncultivated marine Zetaproteobacteria at Loihi  
491 Seamount. *ISME J* **9**: 857–870.
- 492 Fierer N, Bradford MA, Jackson RB. (2007). Toward an ecological classification of  
493 soil bacteria. *Ecology* **88**: 1354–1364.
- 494 Fierer N, Jackson RB. (2006). The diversity and biogeography of soil bacterial  
495 communities. *P Natl Acad Sci USA* **103**: 626–631.
- 496 Fierer N, Ladau J, Clemente JC, Leff JW, Owens SM, Pollard KS, *et al.* (2013).  
497 Reconstructing the Microbial Diversity and Function of Pre-Agricultural Tallgrass  
498 Prairie Soils in the United States. *Science* **342**: 621–624.
- 499 Fierer N, Leff JW, Adams BJ, Nielsen UN, Bates ST, Lauber CL, *et al.* (2012). Cross-  
500 biome metagenomic analyses of soil microbial communities and their functional  
501 attributes. *P Natl Acad Sci USA* **109**: 21390–21395.
- 502 Fuchs G, Boll M, Heider J. (2011). Microbial degradation of aromatic compounds —  
503 from one strategy to four. *Nat Rev Micro* **9**: 803–816.
- 504 Gawad C, Koh W, Quake SR. (2016). Single-cell genome sequencing: current state of  
505 the science. *Nat Rev Genet* **17**: 175–188.
- 506 Gilbert JA, Jansson JK, Knight R. (2014). The Earth Microbiome project: successes  
507 and aspirations. *BMC Biol* **12**: 69.
- 508 Godden B, Ball AS, Helvenstein P, Mccarthy AJ, Penninckx MJ. (1992). Towards

- 509 elucidation of the lignin degradation pathway in actinomycetes. *Journal of General*  
510 *Microbiology* **138**: 2441–2448.
- 511 Guo J, Cole JR, Zhang Q, Brown CT, Tiedje JM. (2015). Microbial Community Analysis  
512 with Ribosomal Gene Fragments from Shotgun Metagenomes Schloss PD (ed).  
513 *Applied and Environmental Microbiology* **82**: 157–166.
- 514 Hug LA, Baker BJ, Anantharaman K, Brown CT, Probst AJ, Castelle CJ, *et al.* (2016). A  
515 new view of the tree of life. *Nat Microbiol* 16048.
- 516 Huttenhower C, Gevers D, Knight R, Abubucker S, Badger JH, Chinwalla AT, *et al.*  
517 (2012). Structure, function and diversity of the healthy human microbiome. *Nature*  
518 **486**: 207–214.
- 519 Janssen PH, Yates PS, Grinton BE, Taylor PM, Sait M. (2002). Improved Culturability  
520 of Soil Bacteria and Isolation in Pure Culture of Novel Members of the Divisions  
521 Acidobacteria, Actinobacteria, Proteobacteria, and Verrucomicrobia. *Applied and*  
522 *Environmental Microbiology* **68**: 2391–2396.
- 523 Kamada N, Chen GY, Inohara N, Núñez G. (2013). Control of pathogens and  
524 pathobionts by the gut microbiota. *Nat Immunol* **14**: 685–690.
- 525 Kashtan N, Roggensack SE, Rodrigue S, Thompson JW, Biller SJ, Coe A, *et al.* (2014).  
526 Single-Cell Genomics Reveals Hundreds of Coexisting Subpopulations in Wild  
527 *Prochlorococcus*. *Science* **344**: 416–420.
- 528 Koven CD, Ringeval B, Friedlingstein P, Ciais P, Cadule P, Khvorostyanov D, *et al.*  
529 (2011). Permafrost carbon-climate feedbacks accelerate global warming. *P Natl*  
530 *Acad Sci USA* **108**: 14769–14774.
- 531 Labonté JM, Swan BK, Poulos B, Luo H, Koren S, Hallam SJ, *et al.* (2015). Single-cell  
532 genomics-based analysis of virus–host interactions in marine surface  
533 bacterioplankton. *ISME J* **9**: 2386–2399.
- 534 Lasken RS. (2012). Genomic sequencing of uncultured microorganisms from single  
535 cells. *Nat Rev Micro* **10**: 631–640.
- 536 Ling LL, Schneider T, Peoples AJ, Spoering AL, Engels I, Conlon BP, *et al.* (2015). A  
537 new antibiotic kills pathogens without detectable resistance. *Nature* **517**: 455–459.
- 538 Long A, Heitman J, Tobias C, Philips R, Song B. (2012). Co-Occurring Anammox,  
539 Denitrification, and Codenitrification in Agricultural Soils. *Applied and*  
540 *Environmental Microbiology* **79**: 168–176.
- 541 Mackelprang R, Waldrop MP, DeAngelis KM, David MM, Chavarria KL, Blazewicz SJ,  
542 *et al.* (2011). Metagenomic analysis of a permafrost microbial community reveals a  
543 rapid response to thaw. *Nature* **480**: 368–371.

- 544 Martijn J, Schulz F, Zaremba-Niedzwiedzka K, Viklund J, Stepanauskas R, Andersson  
545 SGE, *et al.* (2015). Single-cell genomics of a rare environmental  
546 alphaproteobacterium provides unique insights into Rickettsiaceae evolution. *ISME J*  
547 **9**: 2373–2385.
- 548 Martinez-Garcia M, Brazel DM, Swan BK, Arnosti C, Chain PSG, Reitenga KG, *et al.*  
549 (2012). Capturing Single Cell Genomes of Active Polysaccharide Degradors: An  
550 Unexpected Contribution of Verrucomicrobia Ravel J (ed). *PLoS ONE* **7**: e35314.
- 551 Martinez-Garcia M, Swan BK, Poulton NJ, Gomez ML, Masland D, Sieracki ME, *et al.*  
552 (2011). High-throughput single-cell sequencing identifies photoheterotrophs and  
553 chemoautotrophs in freshwater bacterioplankton. *ISME J* **6**: 113–123.
- 554 Nawrocki EP, Eddy SR. (2013). Infernal 1.1: 100-fold faster RNA homology searches.  
555 *Bioinformatics* **29**: 2933–2935.
- 556 Nunes da Rocha U, Van Overbeek L, Van Elsas JD. (2009). Exploration of hitherto-  
557 uncultured bacteria from the rhizosphere. *FEMS Microbiology Ecology* **69**: 313–328.
- 558 Philippot L, Hallin S, Schloter M. (2007). Ecology of Denitrifying Prokaryotes in  
559 Agricultural Soil. In: *Advances in Agronomy* Vol. 96. Elsevier, pp 249–305.
- 560 Price MN, Dehal PS, Arkin AP. (2010). FastTree 2 – Approximately Maximum-  
561 Likelihood Trees for Large Alignments Poon AFY (ed). *PLoS ONE* **5**: e9490.
- 562 Reich P. Global soil suborders.  
563 [http://www.nrcs.usda.gov/wps/portal/nrcs/detail/soils/use/?cid=nrcs142p2\\_054](http://www.nrcs.usda.gov/wps/portal/nrcs/detail/soils/use/?cid=nrcs142p2_054)  
564 013.
- 565 Rideout JR, He Y, Navas-Molina JA, Walters WA, Ursell LK, Gibbons SM, *et al.* (2014).  
566 Subsampled open-reference clustering creates consistent, comprehensive OTU  
567 definitions and scales to billions of sequences. *PeerJ* **2**: e545–25.
- 568 Rinke C, Schwientek P, Sczyrba A, Ivanova NN, Anderson IJ, Cheng J-F, *et al.* (2013).  
569 Insights into the phylogeny and coding potential of microbial dark matter. *Nature*  
570 **499**: 431–437.
- 571 Rupnik M, Wilcox MH, Gerding DN. (2009). Clostridium difficile infection: new  
572 developments in epidemiology and pathogenesis. *Nat Rev Micro* **7**: 526–536.
- 573 Schoenborn L, Yates PS, Grinton BE, Hugenholtz P, Janssen PH. (2004). Liquid Serial  
574 Dilution Is Inferior to Solid Media for Isolation of Cultures Representative of the  
575 Phylum-Level Diversity of Soil Bacteria. *Applied and Environmental Microbiology* **70**:  
576 4363–4366.
- 577 Segata N, Waldron L, Ballarini A, Narasimhan V, Jousson O, Huttenhower C. (2012).  
578 Metagenomic microbial community profiling using unique clade-specific marker

- 579 genes. *Nat Meth* **9**: 811–814.
- 580 Soil Survey Staff 1999. (1999). Soil Taxonomy: A basic system of soil classification  
581 for making and interpreting soil surveys. 2nd ed. U.S. Department of Agriculture  
582 Handbook 436: Natural Resources Conservation Service.
- 583 Stepanauskas R. (2012). Single cell genomics: an individual look at microbes.  
584 *Current Opinion in Microbiology* **15**: 613–620.
- 585 Stepanauskas R, Fergusson E, Brown J, Poulton N, Tupper B, Labonté JM, *et al.*  
586 Improved whole genome amplification and the integrated study of genomic and  
587 optical properties of individual cells and viruses. *Manuscript in preparation*.
- 588 Swan BK, Martinez-Garcia M, Preston CM, Sczyrba A, Woyke T, Lamy D, *et al.* (2011).  
589 Potential for Chemolithoautotrophy Among Ubiquitous Bacteria Lineages in the  
590 Dark Ocean. *Science* **333**: 1296–1300.
- 591 Swan BK, Tupper B, Sczyrba A, Lauro FM, Martinez-Garcia M, Gonzalez JM, *et al.*  
592 (2013). Prevalent genome streamlining and latitudinal divergence of planktonic  
593 bacteria in the surface ocean. *P Natl Acad Sci USA* **110**: 11463–11468.
- 594 Tatusova T, Ciufu S, Fedorov B, O'Neill K, Tolstoy I. (2013). RefSeq microbial  
595 genomes database: new representation and annotation strategy. *Nucleic Acids Res*  
596 **42**: D553–D559.
- 597 Van H T Pham, Kim J. (2012). Cultivation of unculturable soil bacteria. *Trends in*  
598 *Biotechnology* **30**: 475–484.
- 599 Vartoukian SR, Palmer RM, Wade WG. (2010). Strategies for culture of ‘unculturable’  
600 bacteria. *FEMS Microbiology Letters* **309**: 1–7.
- 601 Wang Q, Garrity GM, Tiedje JM, Cole JR. (2007). Naive Bayesian Classifier for Rapid  
602 Assignment of rRNA Sequences into the New Bacterial Taxonomy. *Applied and*  
603 *Environmental Microbiology* **73**: 5261–5267.
- 604 Ward NL, Challacombe JF, Janssen PH, Henrissat B, Coutinho PM, Wu M, *et al.*  
605 (2009). Three Genomes from the Phylum Acidobacteria Provide Insight into the  
606 Lifestyles of These Microorganisms in Soils. *Applied and Environmental Microbiology*  
607 **75**: 2046–2056.
- 608 Wu D, Hugenholtz P, Mavromatis K, Pukall R, Dalin E, Ivanova NN, *et al.* (2009). A  
609 phylogeny-driven genomic encyclopaedia of Bacteria and Archaea. *Nature* **462**:  
610 1056–1060.
- 611 Xue K, Wu L, Deng Y, He Z, Van Nostrand J, Robertson PG, *et al.* (2013). Functional  
612 Gene Differences in Soil Microbial Communities from Conventional, Low-Input, and  
613 Organic Farmlands. *Applied and Environmental Microbiology* **79**: 1284–1292.

## 614 **Figure Legends**

### 615 **Figure 1. Phylogenetic tree of RefSoil**

616 Phylogenetic tree of aligned 16S rRNA genes originating from RefSoil bacterial  
617 genomes. A: Acidobacteria, B: Actinobacteria, C: Aquificae, D: Armatimonadetes, E:  
618 Bacteroidetes, F: Chlamydiae, G: Chlorobi, H: Chloroflexi, J: Cyanobacteria, K:  
619 Deferribacteres, L: Deinococcus-Thermus, N: Firmicutes, O: Fusobacteria, P:  
620 Gemmatimonadetes, Q: Nitrospirae, R: Planctomycetes, S: Proteobacteria, T:  
621 Spirochaetes, U: Synergistetes, V: Tenericutes, W: Thermotogae, X: Verrucomicrobia.

622

### 623 **Figure 2. Functional analysis**

624 The distribution of phylogenetic origins associated with RefSoil functional  
625 subsystems as annotated by RAST (panel A); the overall phylogenetic distribution of  
626 all genes in RefSoil (panel B).

627

### 628 **Figure 3. Phylogenetic tree of EMP OTUs clustered by taxonomy.**

629 Ring I (green) represents the cumulative log-scaled abundance of OTUs in EMP soil  
630 samples. Ring II (red) represents EMP OTUs that share greater than 97% gene  
631 similarity (to RefSoil 16S rRNA genes; ring III (blue) indicates that these 16S rRNA  
632 genes shared similarity to sorted cells that were selected for single cell genomics. A:  
633 Acidobacteria, B: Actinobacteria, C: Aquificae, D: Armatimonadetes, E: Bacteroidetes,  
634 F: Chlamydiae, G: Chlorobi, H: Chloroflexi, I: Crenarchaeota, K: Deferribacteres, L:  
635 Deinococcus-Thermus, M: Euryarchaeota, N: Firmicutes, O: Fusobacteria, P:  
636 Gemmatimonadetes, Q: Nitrospirae, R: Planctomycetes, S: Proteobacteria, T:  
637 Spirochaetes, U: Synergistetes, V: Tenericutes, W: Thermotogae, X: Verrucomicrobia,  
638 Y: Cyanobacteria/Chloroplast.

639

## 640 **Table Legends**

### 641 **Table 1. RefSoil's most wanted OTUs**

642 RefSoil's most wanted OTUs based on observed frequency and abundance in EMP  
643 soil samples. Taxonomy for OTUs are assigned by RDP classifier(Wang *et al.*, 2007).  
644 \*:(Rideout *et al.*, 2014).

645

### 646 **Table 2. Single-cell amplified genomes**

647 Taxonomic classification of single-cell amplified genomes and the abundance of the  
648 most similar EMP OTU. \*: (Rideout *et al.*, 2014).

649

## 650 **Supplementary Description**

### 651 **Supplementary Figure 1. The abundance distribution of phyla**

652 The abundance distribution of phyla ( $\log(\text{abundance}) + 1$ ) present in the RefSoil  
653 database compared to NCBI's RefSeq (A) and phyla that are enriched in RefSoil  
654 compared to RefSeq (B).

655

### 656 **Supplementary Figure 2. Average relative abundance for various soil orders**

657 Average relative abundance of EMP OTUs (sharing similarity with RefSoil genes) for  
658 various soil orders as classified by NRCS Soil Taxonomy.



659

660

661 **Supplementary Table 1. The RefSoil Database**

662

663 **Supplementary Table 2. RefSoil genes in RAST subsystem functions**

664 Total number of RefSoil genes observed in RAST subsystem functions.

665

666 **Supplementary Table 3. Subsystem level functions in RefSoil**

667 The number of unique phyla and the number of enriched phyla associated with  
668 encoded subsystem level functions in RefSoil. (Bold italicized: enriched with genes  
669 associated with three or less phyla)

670

671 **Supplementary Table 4. Abundance of EMP OTUs in soil order**

672 The total abundance of EMP OTUs by soil order in soil samples originating in the  
673 United States.

674

675 **Supplementary Table 5. 100 most abundant OTUs**

676 100 most abundant OTUs in EMP soil samples

677

678 **Supplementary Table 6. 100 most frequent OTUs**

679 100 most frequent OTUs in EMP soil samples

680

681 **Supplementary Table 7. Single cell genomic properties**

682

683 **Table 1. RefSoil's most wanted OTUs**  
 684 RefSoil's most wanted OTUs based on observed frequency and abundance in EMP  
 685 soil samples. Taxonomy for OTUs are assigned by RDP classifier(Wang *et al.*, 2007).  
 686

| OTU ID in<br>(Rideout et<br>al., 2014) | Closest Match in RDP Classifier |                     | RDP Classifier<br>Similarity Score | Abundance<br>(total<br>amplicons) | Number<br>of<br>Samples |
|----------------------------------------|---------------------------------|---------------------|------------------------------------|-----------------------------------|-------------------------|
|                                        | Phylum                          | Class               |                                    |                                   |                         |
| 4457032                                | Verrucomicrobia                 | Spartobacteria      | 1                                  | 8,007,453                         | 2,312                   |
| 4471583                                | Verrucomicrobia                 | Spartobacteria      | 0.92                               | 2,937,242                         | 1,935                   |
| 101868                                 | Verrucomicrobia                 | Spartobacteria      | 1                                  | 1,828,706                         | 2,151                   |
| 559213                                 | Firmicutes                      | Bacilli             | 1                                  | 1,606,757                         | 2,410                   |
| 1105039                                | Verrucomicrobia                 | Spartobacteria      | 1                                  | 1,295,847                         | 2,102                   |
| 807954                                 | Bacteroidetes                   | Sphingobacteriia    | 0.98                               | 875,988                           | 2,546                   |
| 4342972                                | Verrucomicrobia                 | Spartobacteria      | 0.97                               | 750,557                           | 2,386                   |
| 4423681                                | Gemmatimonadetes                | Gemmatimonadetes    | 0.25                               | 689,209                           | 1,954                   |
| 1109646                                | Verrucomicrobia                 | Spartobacteria      | 1                                  | 554,748                           | 2,012                   |
| 610188                                 | Acidobacteria                   | Acidobacteria_Gp6   | 0.99                               | 553,476                           | 2,694                   |
| 4373456                                | Acidobacteria                   | Acidobacteria_Gp4   | 1                                  | 397,255                           | 2,150                   |
| 4341176                                | Verrucomicrobia                 | Subdivision3        | 0.99                               | 383,900                           | 2,098                   |
| 720217                                 | Proteobacteria                  | Deltaproteobacteria | 0.74                               | 345,621                           | 2,073                   |
| 4314933                                | Acidobacteria                   | Acidobacteria_Gp1   | 0.8                                | 333,428                           | 1,974                   |
| 205391                                 | Acidobacteria                   | Acidobacteria_Gp3   | 0.87                               | 327,162                           | 2,190                   |
| 4378940                                | Acidobacteria                   | Acidobacteria_Gp6   | 1                                  | 310,421                           | 2,499                   |
| 946250                                 | Verrucomicrobia                 | Spartobacteria      | 1                                  | 300,544                           | 2,386                   |
| 3122801                                | Acidobacteria                   | Acidobacteria_Gp1   | 0.97                               | 273,493                           | 2,107                   |
| 4450676                                | Proteobacteria                  | Alphaproteobacteria | 1                                  | 255,424                           | 1,963                   |
| 206514                                 | Proteobacteria                  | Alphaproteobacteria | 0.92                               | 207,460                           | 2,075                   |
| 4463040                                | Firmicutes                      | Clostridia          | 0.94                               | 204,483                           | 2,096                   |

687  
 688  
 689

690 **Table 2. Single-cell amplified genomes**  
691 Taxonomic classification of single-cell amplified genomes and the abundance of the  
692 most similar EMP OTU.  
693

| NCBI ID      | Phylum          | Class                    | EMP ID in (Rideout et al., 2014)   | Abundance | Relative Abundance (%) |
|--------------|-----------------|--------------------------|------------------------------------|-----------|------------------------|
| LSTF00000000 | Proteobacteria  | $\beta$ -proteobacteria  | New.52.CleanUp.ReferenceOTU25474   | 81,630    | 2.13E-02               |
| LSTI00000000 | Actinobacteria  | Thermoleophila           | 551344                             | 35,500    | 9.27E-03               |
| LSTA00000000 | Verrucomicrobia | Spartobacteria           | New.54.CleanUp.ReferenceOTU60738   | 5,076     | 1.33E-03               |
| LSTC00000000 | Nitrospirae     | Nitrospira               | New.22.CleanUp.ReferenceOTU3952    | 4,337     | 1.13E-03               |
| LSTH00000000 | Planctomycetes  | Planctomycetia           | 521158                             | 4,161     | 1.09E-03               |
| LSSZ00000000 | Planctomycetes  | Planctomycetia           | New.5.CleanUp.ReferenceOTU188938   | 2,434     | 6.36E-04               |
| LSTE00000000 | Proteobacteria  | $\gamma$ -proteobacteria | NA                                 | NA        | NA                     |
| LSTB00000000 | Proteobacteria  | $\alpha$ -proteobacteria | New.52.CleanUp.ReferenceOTU4588    | 309       | 8.07E-05               |
| LSSY00000000 | Actinobacteria  | Thermoleophila           | 904196                             | 103       | 2.69E-05               |
| LSTG00000000 | Verrucomicrobia | Opiritae                 | New.5.CleanUp.ReferenceOTU291124   | 69        | 1.80E-05               |
| LSTD00000000 | Planctomycetes  | Planctomycetia           | New.59.CleanUp.ReferenceOTU1223798 | 44        | 1.15E-05               |
| LSTJ00000000 | Verrucomicrobia | Verrucomicrobiae         | New.7.CleanUp.ReferenceOTU84651    | 11        | 2.87E-06               |
| LSTK00000000 | Acidobacteria   | Acidobacteriia           | New.59.CleanUp.ReferenceOTU999655  | 4         | 1.04E-06               |
| LSSX00000000 | Chloroflexi     | TK17                     | New.59.CleanUp.ReferenceOTU481621  | 2         | 5.22E-07               |

694  
695  
696

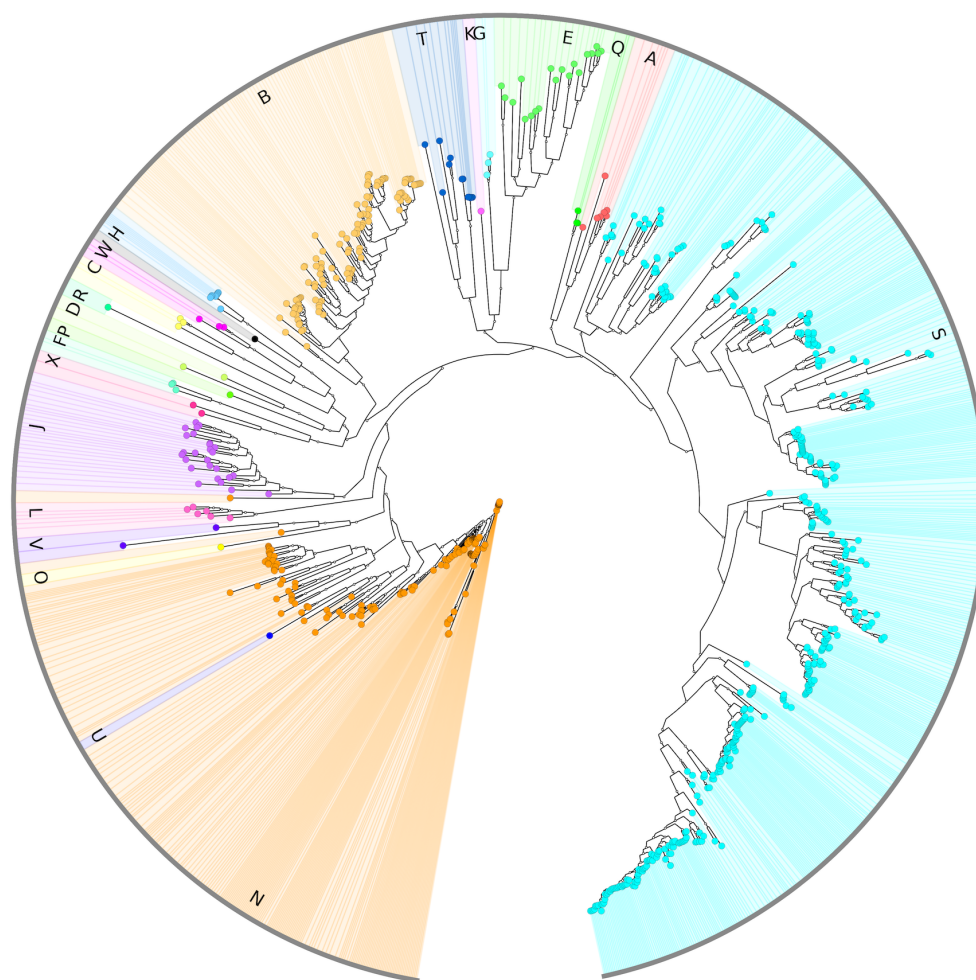

697

698

699 **Figure 1. Phylogenetic tree of RefSoil**

700 Phylogenetic tree of aligned 16S rRNA genes originating from RefSoil bacterial  
701 genomes. A: Acidobacteria, B: Actinobacteria, C: Aquificae, D: Armatimonadetes, E:  
702 Bacteroidetes, F: Chlamydiae, G: Chlorobi, H: Chloroflexi, J: Cyanobacteria, K:  
703 Deferribacteres, L: Deinococcus-Thermus, N: Firmicutes, O: Fusobacteria, P:  
704 Gemmatimonadetes, Q: Nitrospirae, R: Planctomycetes, S: Proteobacteria, T:  
705 Spirochaetes, U: Synergistetes, V: Tenericutes, W: Thermotogae, X: Verrucomicrobia.

706

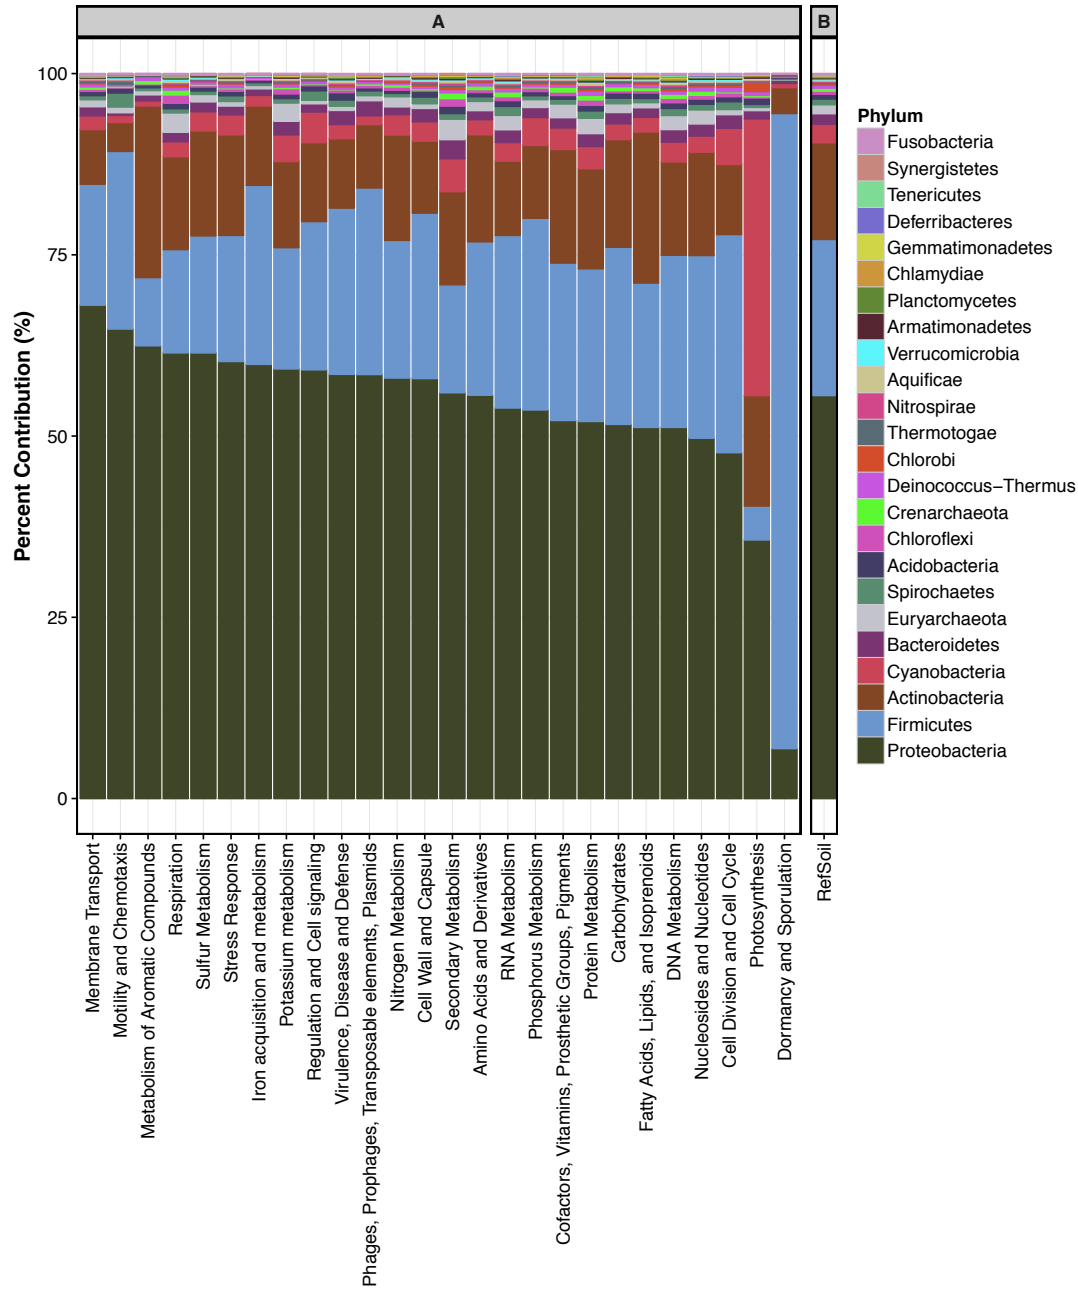

707

708 **Figure 2. Functional analysis**

709 The distribution of phylogenetic origins associated with RefSoil functional  
 710 subsystems as annotated by RAST (panel A); the overall phylogenetic distribution of  
 711 all genes in RefSoil (panel B).

712

713

714

715

716

717

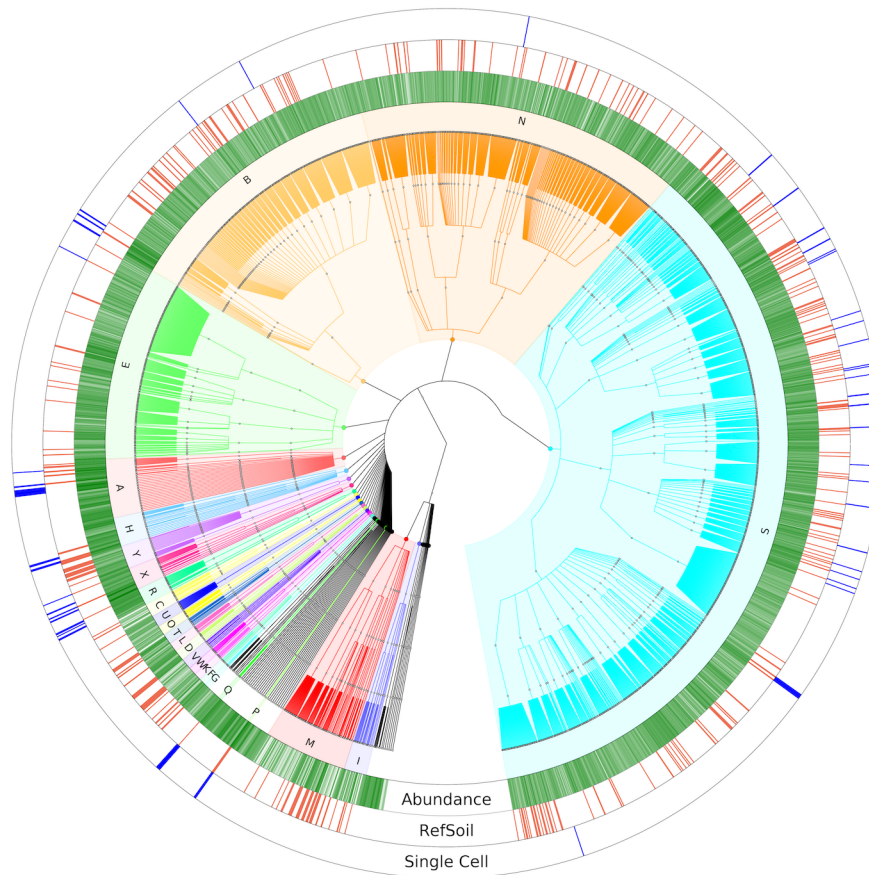

718

719 **Figure 3. Phylogenetic tree of EMP OTUs clustered by taxonomy.**

720 Ring I (green) represents the cumulative log-scaled abundance of OTUs in EMP soil  
721 samples. Ring II (red) represents EMP OTUs that share greater than 97% gene  
722 similarity (to RefSoil 16S rRNA genes; ring III (blue) indicates that these 16S rRNA  
723 genes shared similarity to sorted cells that were selected for single cell genomics. A:  
724 Acidobacteria, B: Actinobacteria, C: Aquificae, D: Armatimonadetes, E: Bacteroidetes,  
725 F: Chlamydiae, G: Chlorobi, H: Chloroflexi, I: Crenarchaeota, K: Deferribacteres, L:  
726 Deinococcus-Thermus, M: Euryarchaeota, N: Firmicutes, O: Fusobacteria, P:  
727 Gemmatimonadetes, Q: Nitrospirae, R: Planctomycetes, S: Proteobacteria, T:  
728 Spirochaetes, U: Synergistetes, V: Tenericutes, W: Thermotogae, X: Verrucomicrobia,  
729 Y: Cyanobacteria/Chloroplast.

730

731

732

733

734
